# Supplementary material
Source: Springer Nature journal article supplement (https://www.springermedizin.de/resource/supplementary/12990_2013_587_MOESM3_ESM.pdf/9613558)

# BPI item5

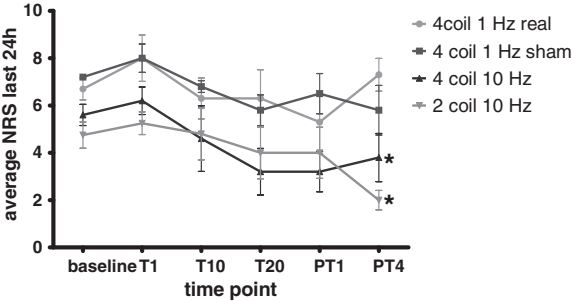

Supplement: MOESM3 [file 9613558]
